# Supplementary material for: Microsatellite markers for 24 loci developed for genotyping eastern woodrats, Neotoma floridana
Source: Research Square preprint supplement (doi:10.21203/rs.3.rs-1777936/v1), 2022-06-27
Supplement: Supplementary file 1 [file 54a696bd72f3e77d0f5871bc.xlsx]

## Sheet: Sheet1
Locus	Primer sequence (5' - 3')	Repeat motif	Size range	Sample Size	Number of alleles	HO	HE	HWE p-value	Annealing Temp ᵒC
NFL001	F: GCAAGACTGCCAACATGTTC	(AC)17	277-297	32	6	0.813	0.794	0.9396	58
	R: GCCCAAGTCCCTTCCATAGG
NFL002	F: GGGCACAAAGAAGGTGACATT	(AGAT)10	230-261	32	9	0.865	0.837	0.8052	56
	R: TGAGACTGCCAGGGTTGAAA
NFL003	F: ACCTCTGACAAATGCACTGA	(AC)14	213-235	32	6	0.688	0.795	0.2077	58
	R: TCACTCCATTGTATACCCATGCA
NFL004	F: AGGTGACTCACAACCAACTGT	(AGAT)12	206-218	32	4	0.500	0.485	0.9147	58
	R: ACCATTGAGCTACATCTCCAATG
NFL005	F: ACCCACTGGTGTGTTCTTCT	(AC)12	281-307	32	5	0.656	0.629	0.7528	56
	R: TGGCCGTGTTATGAGCACTT
NFL006	F: GCTCATTTAAGCTTGGCTCTGA	(AC)14	140-170	32	11	0.813	0.805	0.2455	54
	R: GTCGTTGGTACTTAGGAGGAAGG
NFL007	F: ACACCCAATACCACCTTGCT	(AC)15	296-314	32	8	0.625	0.738	0.0800	56
	R: GGTCCAGCAGGTAAAGGCTC
NFL008	F: AGCAAAGAGTTTCCAGTCCCTT	(AG)10	201-205	32	3	0.484	0.528	0.2583	56
	R: TGGAGGTCAGAGGACAACTC
NFL011	F: AAAGGAGGAGGGAAGGAAGA	(AAGG)9	190-237	32	9	0.844	0.854	0.0800	54
	R: AGGCAAAGAACCCATACACA
NFL012	F: GTGGAGAGGTTGAGAGGAGT	(AC)17	155-182	32	11	0.875	0.836	0.3570	56
	R: AGGCAGAGGCAGATCAGTTT
NFL014	F: ACCTGAGTTCAGTTCCCAGT	(AC)13	274-284	32	5	0.750	0.712	0.2987	56
	R: GACCCTGGTCATTTCTGTTAATC
NFL015	F: GTGTGTATGTGCGAGTGTGC	(AC)17	291-307	32	5	0.375	0.736	0.0005*	56
	R: GCTAGCCTACTTGGGTATTTGC
NFL016	F: AGTGTGGGAGCACCTCTGA	(AGAT)11	170-186	32	5	0.750	0.740	0.7203	55
	R:ACAATAGTGGTTCATGAGCCC
NFL017	F: GCAATCCACATCAATGTTCTGA	(AAC)14	175-205	32	6	0.688	0.689	0.9649	56
	R: TGTTGCCATGGCTCTGTAGG
NFL018	F: GGCATGAGAGAAAGGAAGAATTC	(AT)18	272-292	32	8	0.625	0.798	0.0002*	54
	R: CAGCTTGTTACTTAAGACCAAGAC
NFL019	F: TCATTGGCTTTGGTGCTTGC	(AC)18	144-160	32	8	0.813	0.842	0.7568	56
	R: ACCCAAGTAACCCAAGTGTCC
NFL020	F: CTCTTGAAACCAACGGCAAGA	(AC)16	243-253	32	6	0.813	0.762	0.2197	56
	R: GTGCACACATACACACACGC
NFL021	F: AGTATGGAAAGCAGGATCAGGG	(AC)15	267-283	32	6	0.875	0.742	0.1036	56
	R: GGTTGTCAGAATCAATGATGGCC
NFL022	F: TCTATCTTTCCTTCTCTTCCTTCC	(AAAG)13	267-283	32	6	0.656	0.830	0.0243	54
	R: TGACTGCTCATAGTAGGTGTTCA
NFL024	F: GCACGAGAGATCTACTGGGAC	(AAAG)12	131-181	32	7	0.781	0.774	0.4176	56
	R: TGTAATGAGATCTGGCGCCC
NFL026	F: CTCCTCTGTACAACTTCTAAGGGA	(AC)20	214-244	32	7	0.848	0.838	0.8533	50
	R: GAGCTTGGATTTGAATCAACTGAC
NFL028	F: CTGAGGAAGTGATCACAAGGGA	(AC)25	173-199	32	10	0.969	0.848	0.5720	56
	R: TTACTGCTTGTGTACCGGCC
NFL029	F: TCCCTTCCCTAACTCCTTCCA	(AG)22	181-223	32	14	0.906	0.848	0.5360	46
	R: TGCAAGGCCATATACCCAGG
NFL032	F: TGACAGGGTCCCTACCTCTG	(AC)19	260-282	32	5	0.719	0.776	0.7465	48
	R: ACAATGTATCTGCAGGTTCCA
